# Supplementary material for: The Expansion of the Hellenic Food Thesaurus; Allergens Labelling and Allergens-Free Claims on Greek Branded Food Products
Source: MDPI journal article supplement (doi:10.3390/nu14163421), 2022-08-19
Supplement: s1 [file s1]

**Table S1.** Prevalence of the 14 allergens in the ingredient list among the 3,859 products in HeITH per food subcategory.

| Food Subcategories                     | Milk<br><i>n</i> (%) | Cereals<br><i>n</i> (%) | Soy-<br>bean<br><i>n</i> (%) | Eggs<br><i>n</i> (%) | Nuts<br><i>n</i> (%) | Ses-<br>ame<br><i>n</i> (%) | Mus-<br>tard<br><i>n</i> (%) | Sul-<br>phite<br><i>n</i> (%) | Fish<br><i>n</i> (%) | Celery<br><i>n</i> (%) | Pea-<br>nuts<br><i>n</i> (%) | Mol-<br>luscs<br><i>n</i> (%) | Crusta-<br>ceans<br><i>n</i> (%) | Lupin<br><i>n</i> (%) | At least 1 aller-<br>gen<br><i>n</i> (%) |
|----------------------------------------|----------------------|-------------------------|------------------------------|----------------------|----------------------|-----------------------------|------------------------------|-------------------------------|----------------------|------------------------|------------------------------|-------------------------------|----------------------------------|-----------------------|------------------------------------------|
| Crème                                  | 40 (100)             | 0 (0)                   | 2 (5)                        | 0 (0)                | 0 (0)                | 0 (0)                       | 0 (0)                        | 0 (0)                         | 0 (0)                | 0 (0)                  | 0 (0)                        | 0 (0)                         | 0 (0)                            | 0 (0)                 | 40 (100)                                 |
| Milk                                   | 172<br>(100)         | 0 (0)                   | 3 (2)                        | 0 (0)                | 0 (0)                | 0 (0)                       | 0 (0)                        | 0 (0)                         | 0 (0)                | 0 (0)                  | 0 (0)                        | 0 (0)                         | 0 (0)                            | 0 (0)                 | 172 (100)                                |
| Yogurts                                | 170<br>(100)         | 23 (14)                 | 6 (4)                        | 3 (2)                | 8 (5)                | 10 (6)                      | 0 (0)                        | 0 (0)                         | 0 (0)                | 0 (0)                  | 0 (0)                        | 0 (0)                         | 0 (0)                            | 0 (0)                 | 170 (100)                                |
| Cheese                                 | 213<br>(100)         | 3 (1)                   | 0 (0)                        | 1 (0)                | 0 (0)                | 0 (0)                       | 0 (0)                        | 1 (0)                         | 1 (0)                | 1 (0)                  | 0 (0)                        | 0 (0)                         | 0 (0)                            | 0 (0)                 | 213 (100)                                |
| Milk imitation products                | 2 (4)                | 2 (4)                   | 19 (39)                      | 0 (0)                | 17<br>(35)           | 0 (0)                       | 0 (0)                        | 0 (0)                         | 0 (0)                | 1 (2)                  | 0 (0)                        | 0 (0)                         | 0 (0)                            | 0 (0)                 | 36 (73)                                  |
| Frozen dairy desserts                  | 44 (96)              | 9 (20)                  | 25 (54)                      | 9 (20)               | 16<br>(35)           | 0 (0)                       | 0 (0)                        | 0 (0)                         | 0 (0)                | 0 (0)                  | 0 (0)                        | 0 (0)                         | 0 (0)                            | 0 (0)                 | 44 (96)                                  |
| Eggs                                   | 0 (0)                | 0 (0)                   | 0 (0)                        | 35<br>(100)          | 0 (0)                | 0 (0)                       | 0 (0)                        | 0 (0)                         | 0 (0)                | 0 (0)                  | 0 (0)                        | 0 (0)                         | 0 (0)                            | 0 (0)                 | 35 (100)                                 |
| Canned meat                            | 33 (41)              | 4 (5)                   | 22 (28)                      | 0 (0)                | 0 (0)                | 0 (0)                       | 8 (10)                       | 1 (1)                         | 0 (0)                | 7 (9)                  | 5 (6)                        | 0 (0)                         | 0 (0)                            | 0 (0)                 | 48 (60)                                  |
| Sausage or similar products            | 13 (37)              | 2 (6)                   | 11 (31)                      | 0 (0)                | 0 (0)                | 0 (0)                       | 4 (11)                       | 0 (0)                         | 0 (0)                | 1 (3)                  | 1 (3)                        | 0 (0)                         | 0 (0)                            | 0 (0)                 | 18 (58)                                  |
| Meat dish                              | 11 (52)              | 17 (81)                 | 8 (38)                       | 4 (19)               | 0 (0)                | 0 (0)                       | 2 (10)                       | 0 (0)                         | 0 (0)                | 3 (14)                 | 1 (5)                        | 0 (0)                         | 0 (0)                            | 0 (0)                 | 13 (62)                                  |
| Seafood products                       | 1 (1)                | 8 (11)                  | 0 (0)                        | 0 (0)                | 0 (0)                | 0 (0)                       | 1 (1)                        | 1 (1)                         | 68<br>(91)           | 3 (4)                  | 0 (0)                        | 8 (11)                        | 1 (1)                            | 0 (0)                 | 75 (100)                                 |
| Vegetable fat or oil                   | 3 (38)               | 0 (0)                   | 0 (0)                        | 0 (0)                | 0 (0)                | 0 (0)                       | 0 (0)                        | 0 (0)                         | 0 (0)                | 0 (0)                  | 0 (0)                        | 0 (0)                         | 0 (0)                            | 0 (0)                 | 3 (38)                                   |
| Margarine or mixed origin fat          | 21 (54)              | 0 (0)                   | 1 (3)                        | 0 (0)                | 0 (0)                | 0 (0)                       | 0 (0)                        | 0 (0)                         | 0 (0)                | 0 (0)                  | 0 (0)                        | 0 (0)                         | 0 (0)                            | 0 (0)                 | 21 (54)                                  |
| Butter or animal fat                   | 34 (100)             | 0 (0)                   | 0 (0)                        | 0 (0)                | 0 (0)                | 0 (0)                       | 0 (0)                        | 0 (0)                         | 0 (0)                | 0 (0)                  | 0 (0)                        | 0 (0)                         | 0 (0)                            | 0 (0)                 | 34 (100)                                 |
| Cereal or cereal milling prod-<br>ucts | 11 (22)              | 51 (100)                | 12 (24)                      | 7 (14)               | 0 (0)                | 0 (0)                       | 0 (0)                        | 0 (0)                         | 0 (0)                | 10<br>(20)             | 0 (0)                        | 0 (0)                         | 0 (0)                            | 0 (0)                 | 51 (100)                                 |
| Rice or similar product                | 7 (7)                | 27 (28)                 | 14 (14)                      | 5 (5)                | 0 (0)                | 0 (0)                       | 3 (3)                        | 0 (0)                         | 1 (1)                | 0 (0)                  | 0 (0)                        | 0 (0)                         | 0 (0)                            | 0 (0)                 | 28 (29)                                  |
| Pasta or similar product               | 30 (15)              | 194 (97)                | 1 (0)                        | 29 (14)              | 0 (0)                | 0 (0)                       | 0 (0)                        | 0 (0)                         | 1 (1)                | 0 (0)                  | 0 (0)                        | 0 (0)                         | 0 (0)                            | 0 (0)                 | 194 (97)                                 |
| Breakfast cereals                      | 63 (42)              | 137 (92)                | 65 (44)                      | 0 (0)                | 26<br>(17)           | 2 (2)                       | 0 (0)                        | 12 (8)                        | 0 (0)                | 0 (0)                  | 11 (7)                       | 0 (0)                         | 0 (0)                            | 0 (0)                 | 145 (97)                                 |

|                                |                      |                      |                     |                |                    |                    |                |                |               |               |               |                 |                |                    |                  |
|--------------------------------|----------------------|----------------------|---------------------|----------------|--------------------|--------------------|----------------|----------------|---------------|---------------|---------------|-----------------|----------------|--------------------|------------------|
| Bread or similar product       | 30 (14)              | 206 (97)             | 32 (15)             | 9 (4)          | 1 (0)              | 39<br>(18)         | 3 (1)          | 2 (1)          | 0 (0)         | 1 (0)         | 0 (0)         | 0 (0)           | 0 (0)          | 1 (0)              | 209 (99)         |
| Fine bakery ware               | 182 (70)             | 257 (99)             | 154<br>(59)         | 80 (31)        | 39<br>(15)         | 6 (2)              | 0 (0)          | 7 (3)          | 0 (0)         | 0 (0)         | 3 (1)         | 0 (0)           | 0 (0)          | 3 (1)              | 259 (100)        |
| Savoury cereal dish            | 82 (95)              | 86 (100)             | 21 (24)             | 31 (36)        | 0 (0)              | 4 (5)              | 2 (2)          | 0 (0)          | 0 (0)         | 3 (3)         | 1 (1)         | 0 (0)           | 0 (0)          | 0 (0)              | 83 (97)          |
| Nuts                           | 2 (3)                | 19 (29)              | 4 (6)               | 0 (0)          | 40<br>(61)         | 1 (2)              | 0 (0)          | 4 (6)          | 0 (0)         | 0 (0)         | 23            | 0 (0)           | 0 (0)          | 0 (0)              | 61 (92)          |
| Seeds or Kernel                | 1 (3)                | 0 (0)                | 0 (0)               | 0 (0)          | 0 (0)              | 0 (0)              | 0 (0)          | 0 (0)          | 0 (0)         | 0 (0)         | 0 (0)         | 0 (0)           | 0 (0)          | 0 (0)              | 1 (3)            |
| Nuts or seeds products         | 1 (4)                | 0 (0)                | 6 (22)              | 0 (0)          | 2 (7)              | 21<br>(78)         | 0 (0)          | 0 (0)          | 0 (0)         | 0 (0)         | 4 (15)        | 0 (0)           | 0 (0)          | 0 (0)              | 27 (100)         |
| Vegetables (excluding potato)  | 4 (2)                | 1 (1)                | 0 (0)               | 0 (0)          | 0 (0)              | 0 (0)              | 1 (1)          | 4 (2)          | 0 (0)         | 0 (0)         | 0 (0)         | 0 (0)           | 0 (0)          | 0 (0)              | 11 (6)           |
| Starchy root or potato         | 2 (10)               | 0 (0)                | 0 (0)               | 0 (0)          | 0 (0)              | 0 (0)              | 0 (0)          | 5 (24)         | 0 (0)         | 0 (0)         | 0 (0)         | 0 (0)           | 0 (0)          | 0 (0)              | 7 (33)           |
| Pulse or pulse product         | 0 (0)                | 1 (2)                | 0 (0)               | 0 (0)          | 0 (0)              | 0 (0)              | 0 (0)          | 0 (0)          | 0 (0)         | 0 (0)         | 0 (0)         | 0 (0)           | 0 (0)          | 0 (0)              | 1 (2)            |
| Processed fruit product        | 0 (0)                | 0 (0)                | 0 (0)               | 0 (0)          | 0 (0)              | 0 (0)              | 0 (0)          | 15 (35)        | 0 (0)         | 0 (0)         | 0 (0)         | 0 (0)           | 0 (0)          | 0 (0)              | 15 (35)          |
| Sugar, honey, or syrup         | 0 (0)                | 0 (0)                | 0 (0)               | 0 (0)          | 0 (0)              | 0 (0)              | 0 (0)          | 0 (0)          | 0 (0)         | 0 (0)         | 0 (0)         | 0 (0)           | 0 (0)          | 0 (0)              | 0 (0)            |
| Marmalade                      | 1 (1)                | 2 (2)                | 0 (0)               | 1 (1)          | 1 (1)              | 0 (0)              | 0 (0)          | 0 (0)          | 0 (0)         | 0 (0)         | 0 (0)         | 0 (0)           | 0 (0)          | 0 (0)              | 4 (5)            |
| Sugary products (no chocolate) | 1 (1)                | 0 (0)                | 2 (3)               | 3 (4)          | 14<br>(21)         | 38<br>(56)         | 0 (0)          | 6 (9)          | 0 (0)         | 0 (0)         | 3 (4)         | 0 (0)           | 0 (0)          | 0 (0)              | 49 (72)          |
| Chocolate                      | 159 (77)             | 49 (24)              | 182<br>(88)         | 1 (0)          | 75<br>(36)         | 1 (0)              | 0 (0)          | 1 (0)          | 0 (0)         | 0 (0)         | 8 (4)         | 0 (0)           | 0 (0)          | 0 (0)              | 199 (96)         |
| Juice or nectar                | 0 (0)                | 0 (0)                | 0 (0)               | 0 (0)          | 0 (0)              | 0 (0)              | 0 (0)          | 2 (1)          | 0 (0)         | 1 (1)         | 0 (0)         | 0 (0)           | 0 (0)          | 0 (0)              | 3 (2)            |
| Non-alcoholic beverage         | 5 (2)                | 2 (1)                | 10 (4)              | 0 (0)          | 0 (0)              | 0 (0)              | 0 (0)          | 0 (0)          | 0 (0)         | 0 (0)         | 0 (0)         | 0 (0)           | 0 (0)          | 0 (0)              | 12 (4)           |
| Spices or condiments           | 60 (21)              | 64 (23)              | 33 (12)             | 43 (15)        | 7 (2)              | 2 (1)              | 60 (21)        | 23 (8)         | 3 (1)         | 25 (9)        | 1 (0)         | 1 (0)           | 0 (0)          | 0 (0)              | 189 (67)         |
| Prepared food product          | 75 (47)              | 55 (34)              | 21 (13)             | 26 (16)        | 1 (1)              | 5 (3)              | 24 (15)        | 2 (1)          | 6 (4)         | 18<br>(11)    | 1 (1)         | 0 (0)           | 2 (1)          | 0 (0)              | 116 (73)         |
| Ready-to-eat meal              | 19 (50)              | 25 (66)              | 11 (29)             | 15 (39)        | 3 (8)              | 2 (5)              | 12 (32)        | 17 (45)        | 5 (13)        | 8 (21)        | 1 (3)         | 1 (3)           | 2 (5)          | 0 (0)              | 35 (92)          |
| Frozen, semi-ready meal        | 6 (15)               | 16 (40)              | 8 (20)              | 2 (5)          | 1 (3)              | 1 (3)              | 0 (0)          | 0 (0)          | 1 (3)         | 3 (8)         | 0 (0)         | 0 (0)           | 0 (0)          | 0 (0)              | 19 (48)          |
| <b>Total</b>                   | <b>1498<br/>(39)</b> | <b>1260<br/>(33)</b> | <b>673<br/>(17)</b> | <b>304 (8)</b> | <b>251<br/>(7)</b> | <b>132<br/>(3)</b> | <b>120 (3)</b> | <b>103 (3)</b> | <b>86 (2)</b> | <b>85 (2)</b> | <b>63 (2)</b> | <b>10 (0.3)</b> | <b>5 (0.1)</b> | <b>4<br/>(0.1)</b> | <b>2640 (68)</b> |

**Table S2.** Prevalence of the 14 allergens in a precautionary statement among the 3,859 products in HeITH per food subcategory.

| Food Subcategories                | Milk<br><i>n</i> (%) | Cereal<br><i>n</i> (%) | Soybean<br><i>n</i> (%) | Eggs<br><i>n</i> (%) | Nuts<br><i>n</i> (%) | Sesame<br><i>n</i> (%) | Mustard<br><i>n</i> (%) | Sulphite<br><i>n</i> (%) | Fish<br><i>n</i> (%) | Celery<br><i>n</i> (%) | Peanut<br><i>n</i> (%) |
|-----------------------------------|----------------------|------------------------|-------------------------|----------------------|----------------------|------------------------|-------------------------|--------------------------|----------------------|------------------------|------------------------|
| Cream                             | 0 (0)                | 0 (0)                  | 0 (0)                   | 0 (0)                | 0 (0)                | 0 (0)                  | 0 (0)                   | 0 (0)                    | 0 (0)                | 0 (0)                  | 0 (0)                  |
| Milk                              | 0 (0)                | 0 (0)                  | 0 (0)                   | 0 (0)                | 0 (0)                | 0 (0)                  | 0 (0)                   | 0 (0)                    | 0 (0)                | 0 (0)                  | 0 (0)                  |
| Yogurts                           | 0 (0)                | 8 (5)                  | 4 (2)                   | 7 (4)                | 12 (7)               | 10 (6)                 | 0 (0)                   | 0 (0)                    | 0 (0)                | 0 (0)                  | 7 (4)                  |
| Cheese                            | 0 (0)                | 2 (1)                  | 3 (1)                   | 6 (3)                | 0 (0)                | 0 (0)                  | 5 (2)                   | 5 (2)                    | 0 (0)                | 3 (1)                  | 0 (0)                  |
| Milk imitation products           | 0 (0)                | 0 (0)                  | 1 (2)                   | 0 (0)                | 6 (12)               | 0 (0)                  | 0 (0)                   | 0 (0)                    | 0 (0)                | 0 (0)                  | 0 (0)                  |
| Frozen dairy desserts             | 0 (0)                | 16 (35)                | 11 (24)                 | 18 (39)              | 22 (48)              | 4 (9)                  | 0 (0)                   | 0 (0)                    | 0 (0)                | 0 (0)                  | 18 (39)                |
| Eggs                              | 0 (0)                | 0 (0)                  | 0 (0)                   | 0 (0)                | 0 (0)                | 0 (0)                  | 0 (0)                   | 0 (0)                    | 0 (0)                | 0 (0)                  | 0 (0)                  |
| Canned meat                       | 20 (25)              | 12 (15)                | 34 (43)                 | 29 (36)              | 42 (53)              | 1 (1)                  | 47 (59)                 | 27 (34)                  | 0 (0)                | 45 (56)                | 6 (8)                  |
| Sausage or similar products       | 8 (23)               | 4 (11)                 | 7 (20)                  | 13 (37)              | 11 (31)              | 0 (0)                  | 13 (37)                 | 10 (29)                  | 0 (0)                | 16 (46)                | 4 (11)                 |
| Meat dish                         | 8 (38)               | 2 (10)                 | 0 (0)                   | 3 (14)               | 3 (14)               | 0 (0)                  | 9 (43)                  | 0 (0)                    | 0 (0)                | 3 (14)                 | 0 (0)                  |
| Seafood products                  | 1 (1)                | 1 (1)                  | 1 (1)                   | 1 (1)                | 0 (0)                | 0 (0)                  | 1 (1)                   | 0 (0)                    | 0 (0)                | 1 (1)                  | 0 (0)                  |
| Vegetable fat or oil              | 0 (0)                | 0 (0)                  | 0 (0)                   | 0 (0)                | 0 (0)                | 0 (0)                  | 0 (0)                   | 0 (0)                    | 0 (0)                | 0 (0)                  | 0 (0)                  |
| Margarine or mixed origin fat     | 12 (31)              | 0 (0)                  | 0 (0)                   | 0 (0)                | 0 (0)                | 0 (0)                  | 0 (0)                   | 0 (0)                    | 0 (0)                | 0 (0)                  | 0 (0)                  |
| Butter or animal fat              | 0 (0)                | 0 (0)                  | 0 (0)                   | 0 (0)                | 0 (0)                | 0 (0)                  | 0 (0)                   | 0 (0)                    | 0 (0)                | 0 (0)                  | 0 (0)                  |
| Cereal or cereal milling products | 25 (25)              | 0 (0)                  | 15 (29)                 | 28 (55)              | 15 (29)              | 21 (41)                | 16 (31)                 | 1 (2)                    | 1 (2)                | 5 (10)                 | 4 (8)                  |
| Rice or similar product           | 12 (12)              | 4 (4)                  | 8 (8)                   | 17 (18)              | 3 (3)                | 16 (16)                | 16 (16)                 | 0 (0)                    | 6 (6)                | 9 (9)                  | 8 (8)                  |
| Pasta or similar product          | 12 (6)               | 0 (0)                  | 73 (36)                 | 47 (23)              | 1 (0)                | 4 (2)                  | 2 (1)                   | 0 (0)                    | 0 (0)                | 2 (1)                  | 1 (0)                  |
| Breakfast cereals                 | 55 (37)              | 3 (2)                  | 29 (19)                 | 3 (2)                | 87 (58)              | 25 (17)                | 2 (1)                   | 1 (1)                    | 0 (0)                | 0 (0)                  | 43 (29)                |
| Bread or similar product          | 87 (41)              | 2 (1)                  | 38 (18)                 | 79 (37)              | 46 (22)              | 100 (47)               | 1 (0)                   | 0 (0)                    | 0 (0)                | 1 (0)                  | 4 (2)                  |
| Fine bakery wares                 | 46 (18)              | 0 (0)                  | 56 (22)                 | 104 (40)             | 163 (63)             | 73 (28)                | 5 (2)                   | 12 (5)                   | 0 (0)                | 5 (2)                  | 65 (25)                |
| Savoury cereal dish               | 3 (3)                | 0 (0)                  | 24 (28)                 | 35 (41)              | 36 (42)              | 61 (71)                | 38 (44)                 | 2 (2)                    | 2 (2)                | 21 (24)                | 1 (1)                  |
| Nuts                              | 2 (3)                | 38 (58)                | 2 (3)                   | 0 (0)                | 24 (36)              | 43 (65)                | 1 (2)                   | 0 (0)                    | 0 (0)                | 0 (0)                  | 40 (61)                |
| Seeds or Kernel                   | 0 (0)                | 0 (0)                  | 0 (0)                   | 0 (0)                | 2 (6)                | 0 (0)                  | 0 (0)                   | 0 (0)                    | 0 (0)                | 0 (0)                  | 0 (0)                  |
| Nuts or seeds products            | 2 (2)                | 8 (30)                 | 0 (0)                   | 0 (0)                | 3 (11)               | 4 (15)                 | 0 (0)                   | 3 (11)                   | 0 (0)                | 0 (0)                  | 0 (0)                  |

|                                |          |          |          |          |          |          |         |        |         |         |         |
|--------------------------------|----------|----------|----------|----------|----------|----------|---------|--------|---------|---------|---------|
| Vegetables (excluding potato)  | 0 (0)    | 0 (0)    | 0 (0)    | 0 (0)    | 1 (1)    | 0 (0)    | 0 (0)   | 2 (1)  | 0 (0)   | 3 (2)   | 0 (0)   |
| Starchy root or potato         | 8 (38)   | 6 (29)   | 0 (0)    | 3 (14)   | 0 (0)    | 0 (0)    | 0 (0)   | 0 (0)  | 0 (0)   | 3 (14)  | 0 (0)   |
| Pulse or pulse product         | 0 (0)    | 1 (2)    | 0 (0)    | 0 (0)    | 0 (0)    | 0 (0)    | 0 (0)   | 0 (0)  | 0 (0)   | 0 (0)   | 0 (0)   |
| Processed fruit product        | 0 (0)    | 4 (9)    | 0 (0)    | 0 (0)    | 4 (9)    | 2 (5)    | 0 (0)   | 1 (2)  | 0 (0)   | 0 (0)   | 4 (9)   |
| Sugar, honey, or syrup         | 0 (0)    | 0 (0)    | 0 (0)    | 0 (0)    | 0 (0)    | 0 (0)    | 0 (0)   | 4 (9)  | 0 (0)   | 0 (0)   | 0 (0)   |
| Marmalade                      | 2 (2)    | 9 (11)   | 0 (0)    | 0 (0)    | 0 (0)    | 0 (0)    | 0 (0)   | 0 (0)  | 0 (0)   | 0 (0)   | 0 (0)   |
| Sugary products (no chocolate) | 2 (3)    | 1 (1)    | 1 (1)    | 2 (3)    | 31 (46)  | 4 (6)    | 0 (0)   | 5 (7)  | 0 (0)   | 0 (0)   | 32 (47) |
| Chocolate                      | 48 (23)  | 112 (54) | 3 (1)    | 26 (13)  | 121 (58) | 12 (6)   | 0 (0)   | 4 (2)  | 0 (0)   | 0 (0)   | 67 (32) |
| Juice or nectar                | 0 (0)    | 0 (0)    | 0 (0)    | 0 (0)    | 0 (0)    | 0 (0)    | 0 (0)   | 0 (0)  | 0 (0)   | 0 (0)   | 0 (0)   |
| Non-alcoholic beverage         | 10 (4)   | 2 (1)    | 3 (1)    | 0 (0)    | 3 (1)    | 1 (0)    | 0 (0)   | 0 (0)  | 0 (0)   | 0 (0)   | 1 (0)   |
| Spices or condiments           | 50 (18)  | 53 (19)  | 47 (17)  | 54 (19)  | 46 (16)  | 16 (6)   | 30 (11) | 7 (2)  | 25 (9)  | 40 (14) | 22 (8)  |
| Prepared food product          | 46 (29)  | 56 (35)  | 51 (32)  | 20 (13)  | 18 (11)  | 15 (9)   | 26 (16) | 2 (1)  | 32 (20) | 55 (34) | 16 (10) |
| Ready-to-eat meal              | 7 (18)   | 6 (16)   | 11 (29)  | 7 (18)   | 6 (16)   | 10 (26)  | 11 (29) | 6 (16) | 14 (37) | 24 (63) | 6 (16)  |
| Frozen, semi-ready meal        | 3 (8)    | 1 (3)    | 0 (0)    | 5 (13)   | 0 (0)    | 5 (13)   | 4 (10)  | 5 (13) | 0 (0)   | 8 (20)  | 0 (0)   |
| <b>Total</b>                   | 469 (12) | 351 (9)  | 422 (11) | 507 (13) | 706 (18) | 427 (11) | 227 (6) | 97 (3) | 80 (2)  | 244 (6) | 349 (9) |

**Table S3.** Prevalence of allergen-free claims per food subcategory.

[illegible]

|                                |           |          |         |         |         |         |          |          |           |
|--------------------------------|-----------|----------|---------|---------|---------|---------|----------|----------|-----------|
| Processed fruit product        | 0 (0)     | 0 (0)    | 0 (0)   | 0 (0)   | 0 (0)   | 0 (0)   | 0 (0)    | 0 (0)    | 0 (0)     |
| Sugar, honey, or syrup         | 0 (0)     | 0 (0)    | 0 (0)   | 0 (0)   | 0 (0)   | 0 (0)   | 0 (0)    | 0 (0)    | 0 (0)     |
| Marmalade                      | 0 (0)     | 0 (0)    | 0 (0)   | 0 (0)   | 0 (0)   | 0 (0)   | 0 (0)    | 0 (0)    | 0 (0)     |
| Sugary products (no chocolate) | 8 (12)    | 0 (0)    | 0 (0)   | 0 (0)   | 0 (0)   | 0 (0)   | 0 (0)    | 0 (0)    | 8 (12)    |
| Chocolate                      | 17 (8)    | 1 (0)    | 0 (0)   | 0 (0)   | 0 (0)   | 0 (0)   | 0 (0)    | 0 (0)    | 18 (9)    |
| Juice or nectar                | 4 (2)     | 4 (2)    | 0 (0)   | 0 (0)   | 0 (0)   | 0 (0)   | 0 (0)    | 0 (0)    | 4 (2)     |
| Non-alcoholic beverage         | 6 (2)     | 0 (0)    | 0 (0)   | 0 (0)   | 0 (0)   | 0 (0)   | 0 (0)    | 0 (0)    | 6 (2)     |
| Spices or condiments           | 8 (3)     | 0 (0)    | 0 (0)   | 0 (0)   | 0 (0)   | 0 (0)   | 0 (0)    | 0 (0)    | 8 (3)     |
| Prepared food product          | 14 (9)    | 1 (1)    | 1 (0.6) | 1 (0.6) | 0 (0)   | 0 (0)   | 0 (0)    | 0 (0)    | 14 (9)    |
| Ready-to-eat meal              | 0 (0)     | 0 (0)    | 0 (0)   | 0 (0)   | 0 (0)   | 0 (0)   | 0 (0)    | 0 (0)    | 0 (0)     |
| Frozen, semi-ready meal        | 5 (13)    | 0 (0)    | 0 (0)   | 0 (0)   | 0 (0)   | 0 (0)   | 0 (0)    | 0 (0)    | 5 (13)    |
| <b>Total</b>                   | 178 (4.6) | 62 (1.6) | 6 (0.2) | 2 (0.1) | 2 (0.1) | 2 (0.1) | 1 (0.03) | 1 (0.03) | 206 (5.3) |
